# Supplementary material for: Effects of Climatic Factors on Diarrheal Diseases among Children below 5 Years of Age at National and Subnational Levels in Nepal: An Ecological Study
Source: MDPI journal article supplement (doi:10.3390/ijerph19106138), 2022-05-18
Supplement: s1 [file s1]

## Supplementary Materials

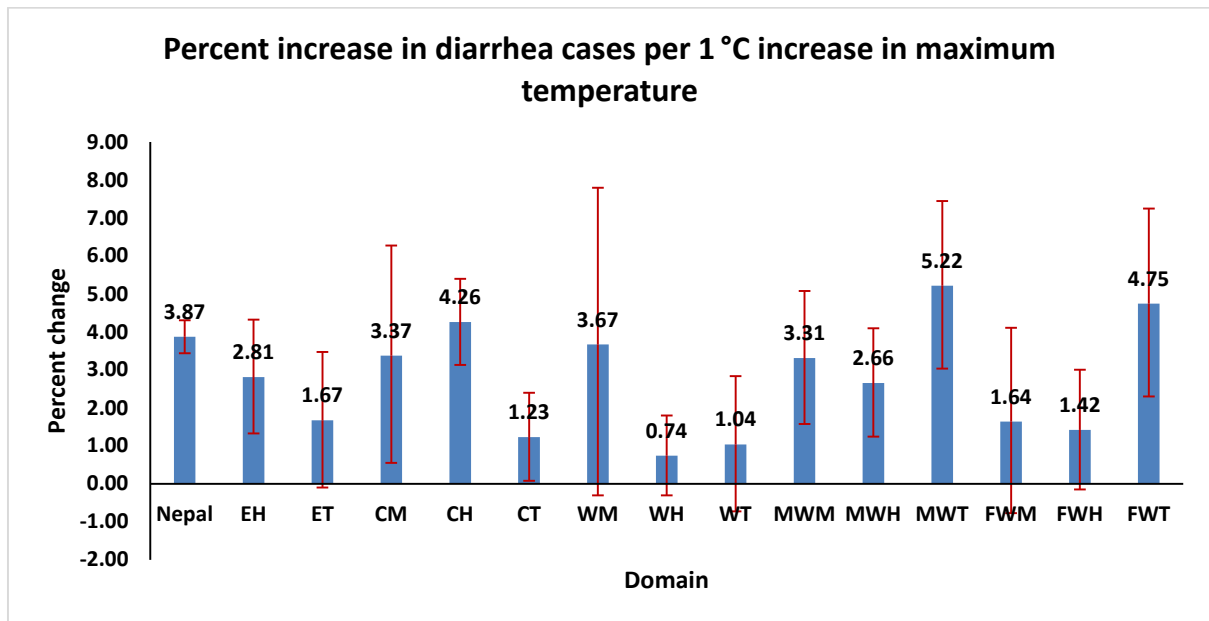

**Supplementary Figure S1.** Percentage increase in diarrheal cases per 1 °C increase in maximum temperature.

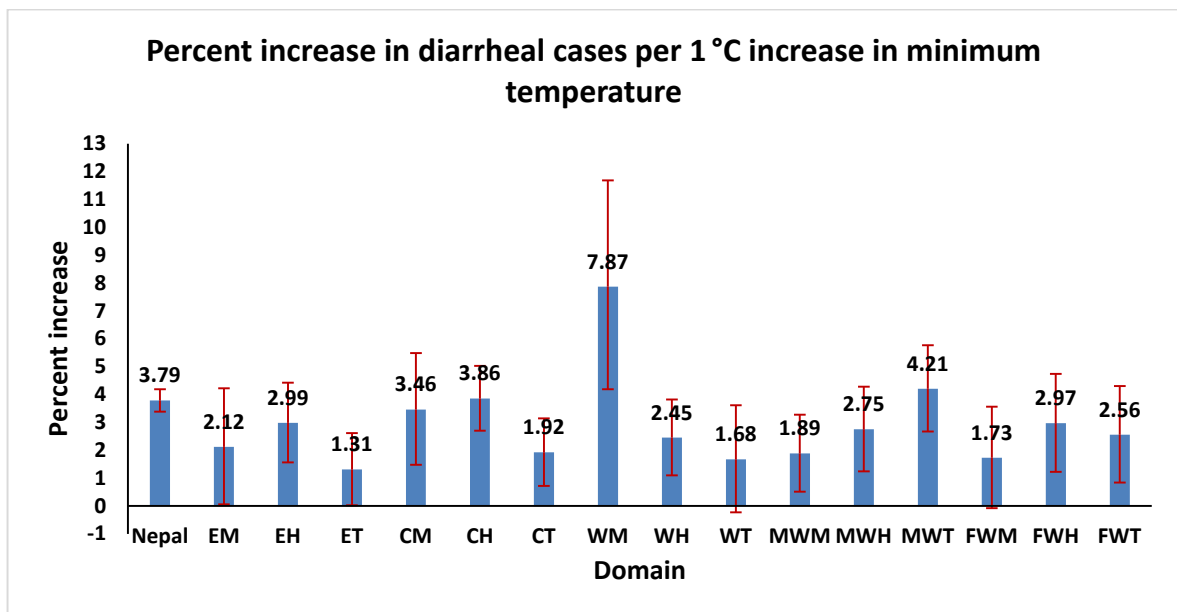

**Supplementary Figure S2.** Percentage increase in diarrheal cases per 1 °C increase in minimum temperature.

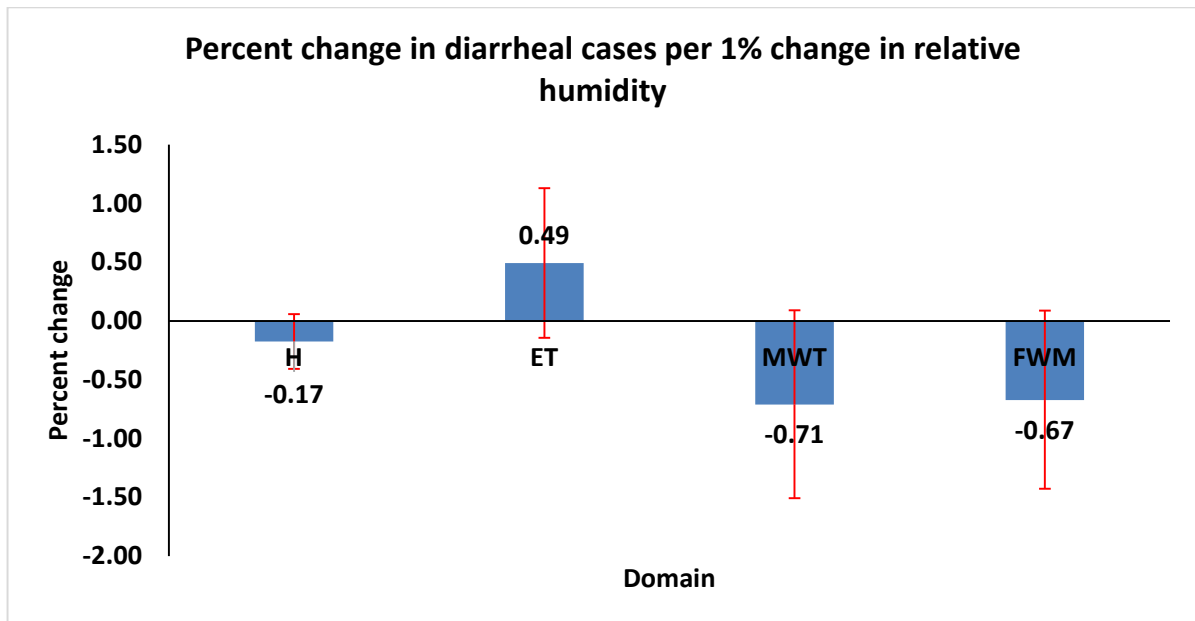

**Supplementary Figure S3.** Percentage change in diarrheal cases per 1% increase in relative humidity.

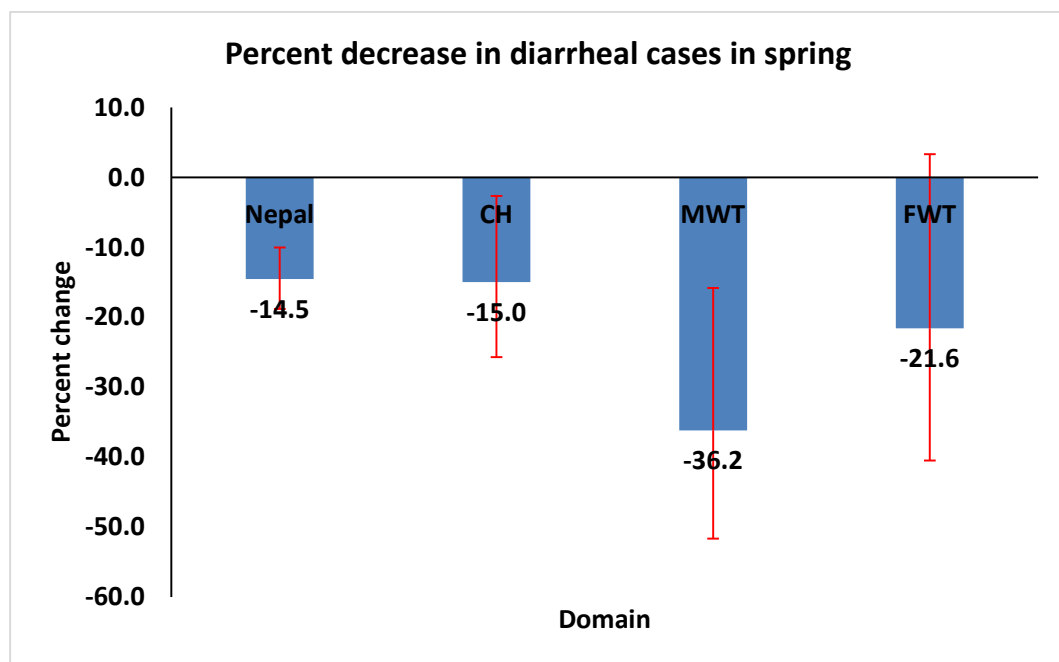

**Supplementary Figure S4.** Percentage decrease in diarrheal cases in spring season with reference to summer.

Note: Data in the chart only include the domains that show significant effect.

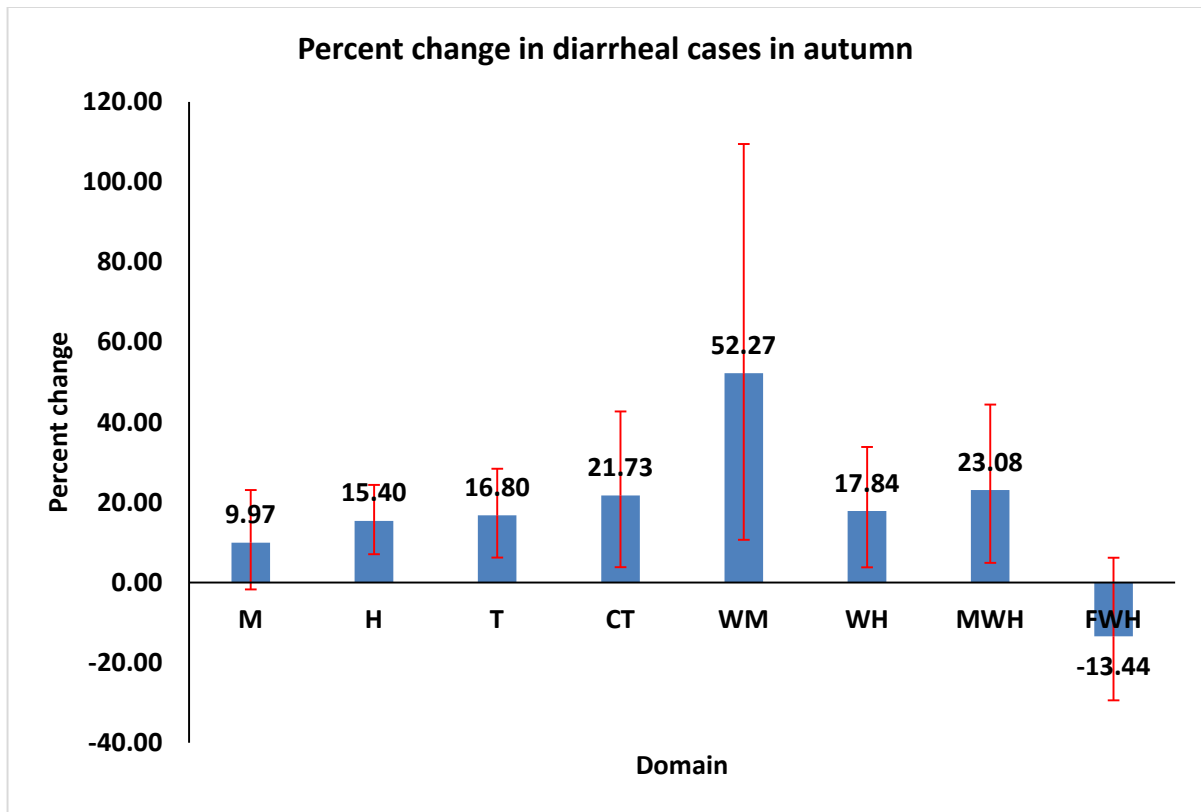

**Supplementary Figure S5.** Percentage change in diarrheal cases in autumn season with reference to winter.

Note: Data in the chart only include the domains that show significant effect.
